# Supplementary material
Source: PubMed Central journal article supplement (PMC4920326)
Supplement: rspb20160834supp3.pdf [file rspb20160834supp3.pdf]

**Table S4.** Model comparisons for Lyme disease and babesiosis. (We fitted a series of nested models and evaluate model fit with  $\Delta$ DIC compared with the non-spatial process-based model. Process-based models include: (i) a non-spatial process model; (ii) a spatial model allowing for linear dependence of invasion mechanisms on local infection risk; (iii) a full covariate model including nonlinear dependence of invasion mechanisms on local infection risk and ecological covariates; (iv) a parsimonious model excluding any covariate from the full covariate model with a 95% credible interval that includes 0; and (v) a parsimonious model without the observation process. To justify modelling latent ecological processes, we also present results of fitting a ‘null’ phenomenological model described in the electronic supplementary material, text S1. All models estimate  $B$ , the coefficient for population size offset.)

|              | model description            | observation parameter | ecological parameters                                                                                                                                                                | DIC    | $\Delta$ DIC |
|--------------|------------------------------|-----------------------|--------------------------------------------------------------------------------------------------------------------------------------------------------------------------------------|--------|--------------|
| Lyme disease | process-based model          | $r_s$                 | $\mathbf{p}, \phi_0, \gamma_0, \theta_0$                                                                                                                                             | 17 462 | —            |
|              | linear spatial dependence    | $r_s$                 | $\mathbf{p}, \phi_0, \phi_1, \gamma_0, \gamma_1, \theta_0, \theta_1$                                                                                                                 | 14 774 | 2688         |
|              | full covariate               | $r_s$                 | $\mathbf{p}, \phi_0, \phi_1, \phi_2, \phi_3, \phi_4, \gamma_0, \gamma_1, \gamma_2, \gamma_3, \gamma_4, \theta_0, \theta_1, \theta_2, \theta_3, \theta_4$                             | 14 321 | 3141         |
|              | parsimonious model           | $r_s$                 | $\mathbf{p}, \phi_0, \phi_1, \phi_2, \phi_3, \gamma_0, \gamma_1, \gamma_2, \theta_0, \theta_1, \theta_3$                                                                             | 14 316 | 3146         |
|              | parsimonious no observation  | $r_s$                 | $\mathbf{p}, \phi_0, \phi_1, \phi_2, \phi_3, \gamma_0, \gamma_1, \gamma_2, \theta_0, \theta_1, \theta_3$                                                                             | 14 333 | 3129         |
|              | null                         | $r_s$                 | $\tau_0, \tau_1, \tau_2$                                                                                                                                                             | 16 214 | 1248         |
| babesiosis   | process-based model          | $r_s$                 | $\mathbf{p}, \phi_0, \gamma_0, \theta_0$                                                                                                                                             | 8691   | —            |
|              | linear spatial dependence    | $r_s$                 | $\mathbf{p}, \phi_0, \phi_1, \gamma_0, \gamma_1, \theta_0, \theta_1$                                                                                                                 | 8038   | 653          |
|              | full covariate               | $r_s$                 | $\mathbf{p}, \phi_0, \phi_1, \phi_2, \phi_3, \phi_4, \phi_5, \gamma_0, \gamma_1, \gamma_2, \gamma_3, \gamma_4, \gamma_5, \theta_0, \theta_1, \theta_2, \theta_3, \theta_4, \theta_5$ | 7293   | 1398         |
|              | parsimonious model           | $r_s$                 | $\mathbf{p}, \phi_0, \phi_1, \phi_3, \phi_4, \phi_5, \gamma_0, \gamma_1, \gamma_2, \gamma_4, \gamma_5, \theta_0, \theta_1, \theta_4$                                                 | 7287   | 1404         |
|              | parsimonious, no observation |                       | $\mathbf{p}, \phi_0, \phi_1, \phi_3, \phi_4, \phi_5, \gamma_0, \gamma_1, \gamma_2, \gamma_4, \gamma_5, \theta_0, \theta_1, \theta_4$                                                 | 7355   | 1336         |
|              | null                         | $r_s$                 | $\tau_0, \tau_1, \tau_2$                                                                                                                                                             | 8634   | 57           |
