# Supplementary material
Source: PubMed Central journal article supplement (PMC4920326)

## Lyme disease

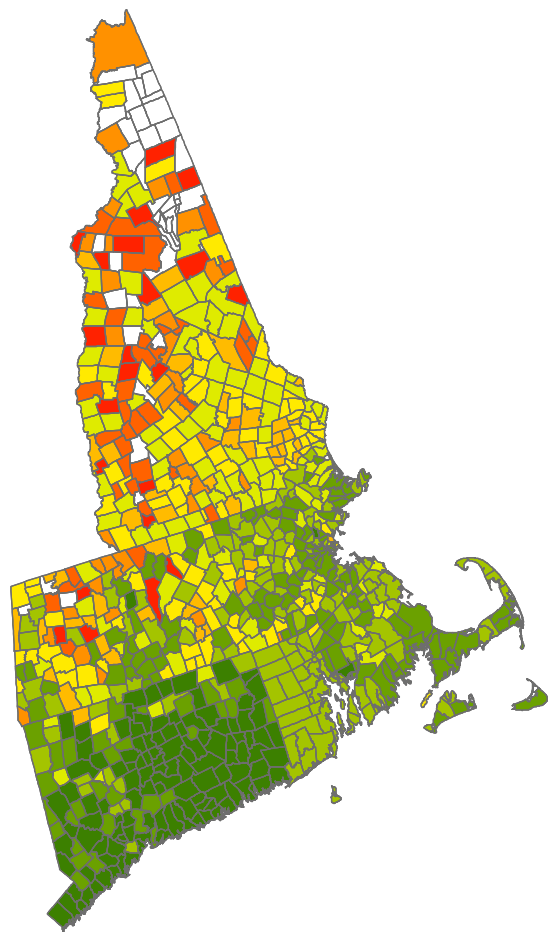

## Babesiosis

### First year of reporting

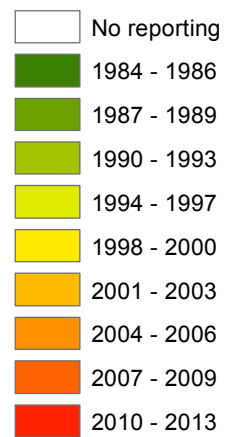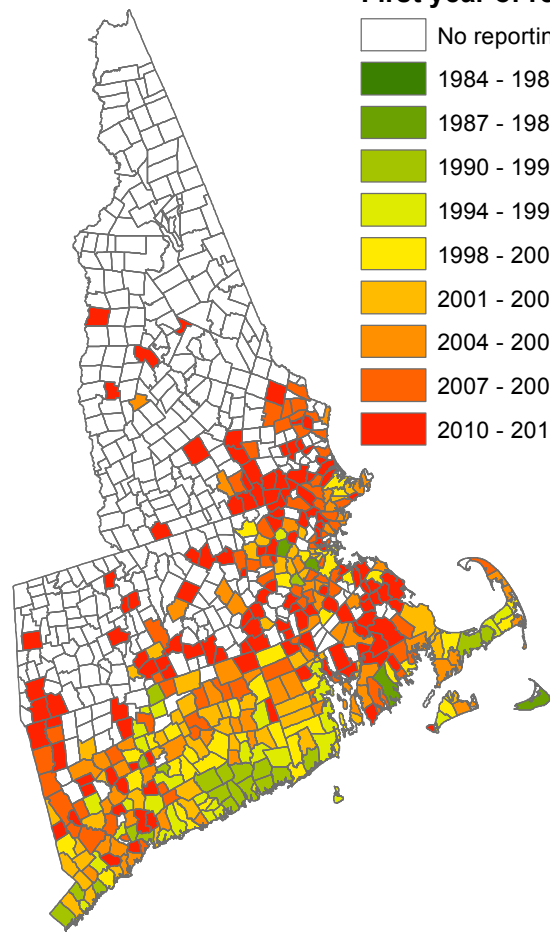

**A**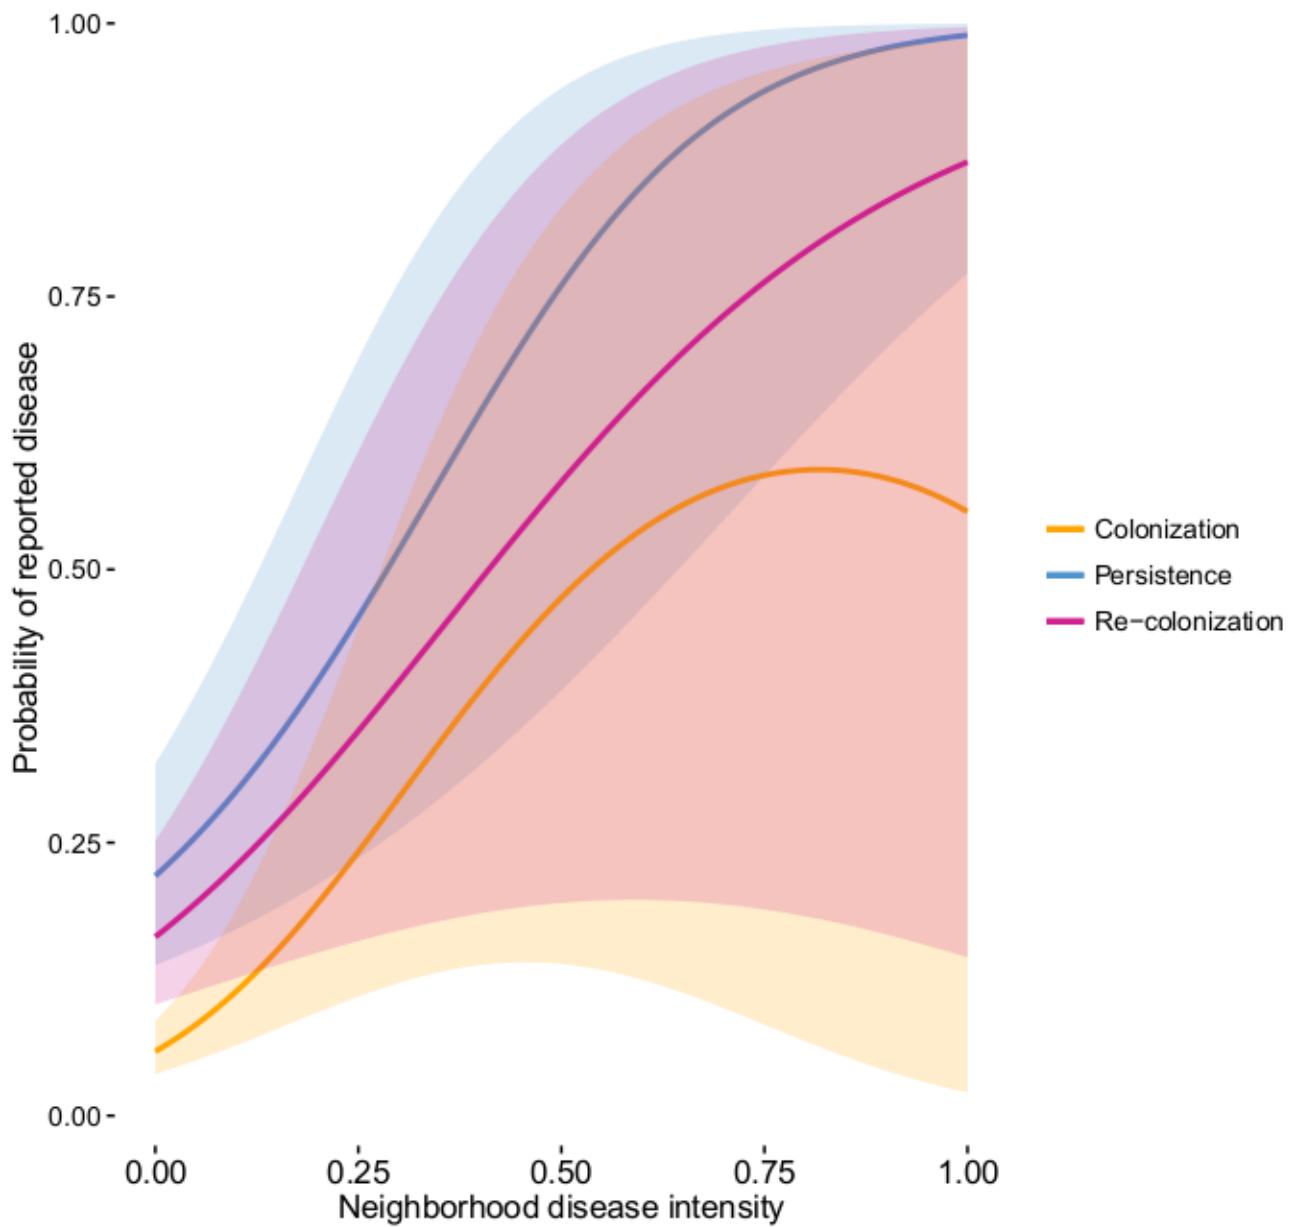**B**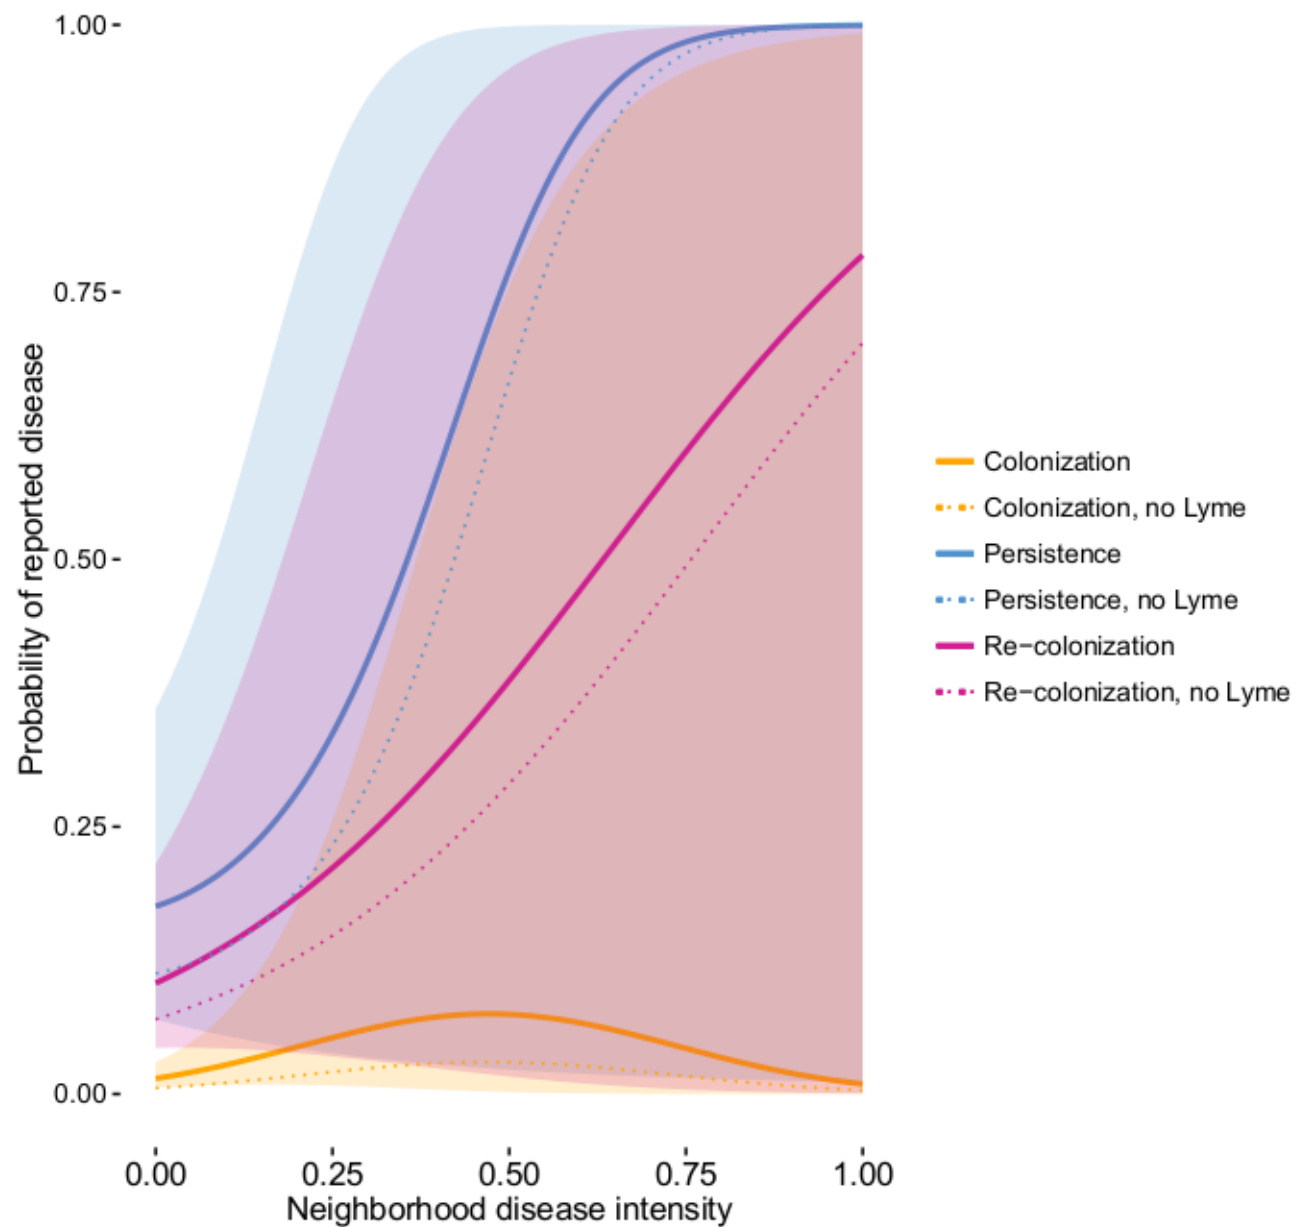

**A**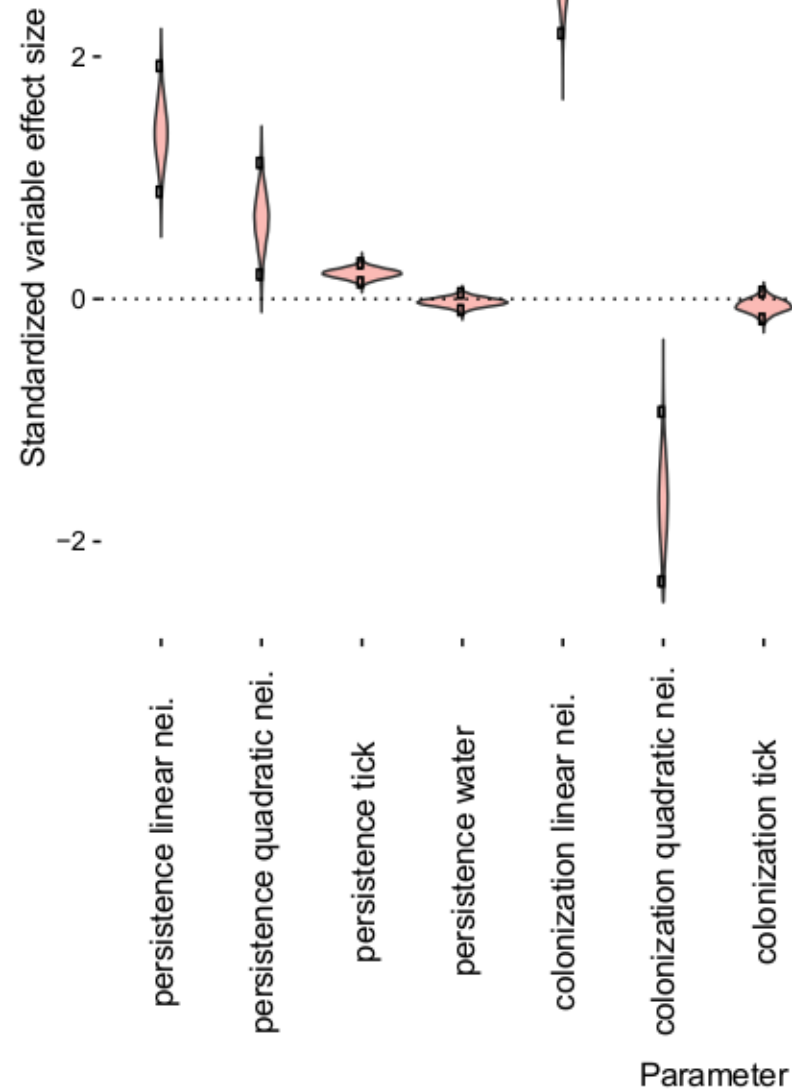**B**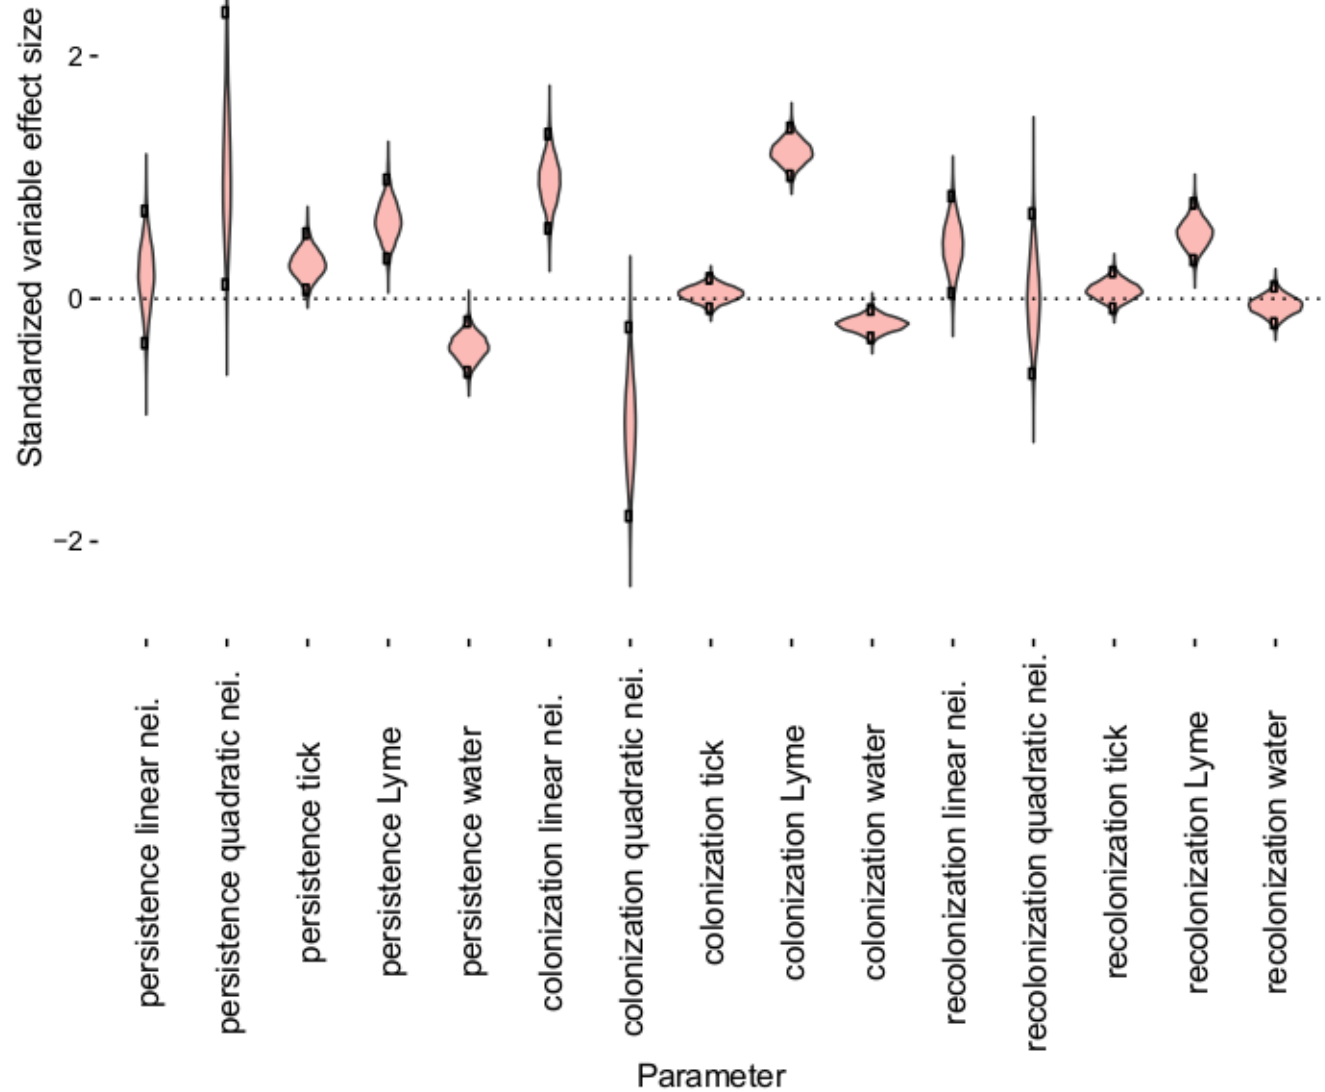

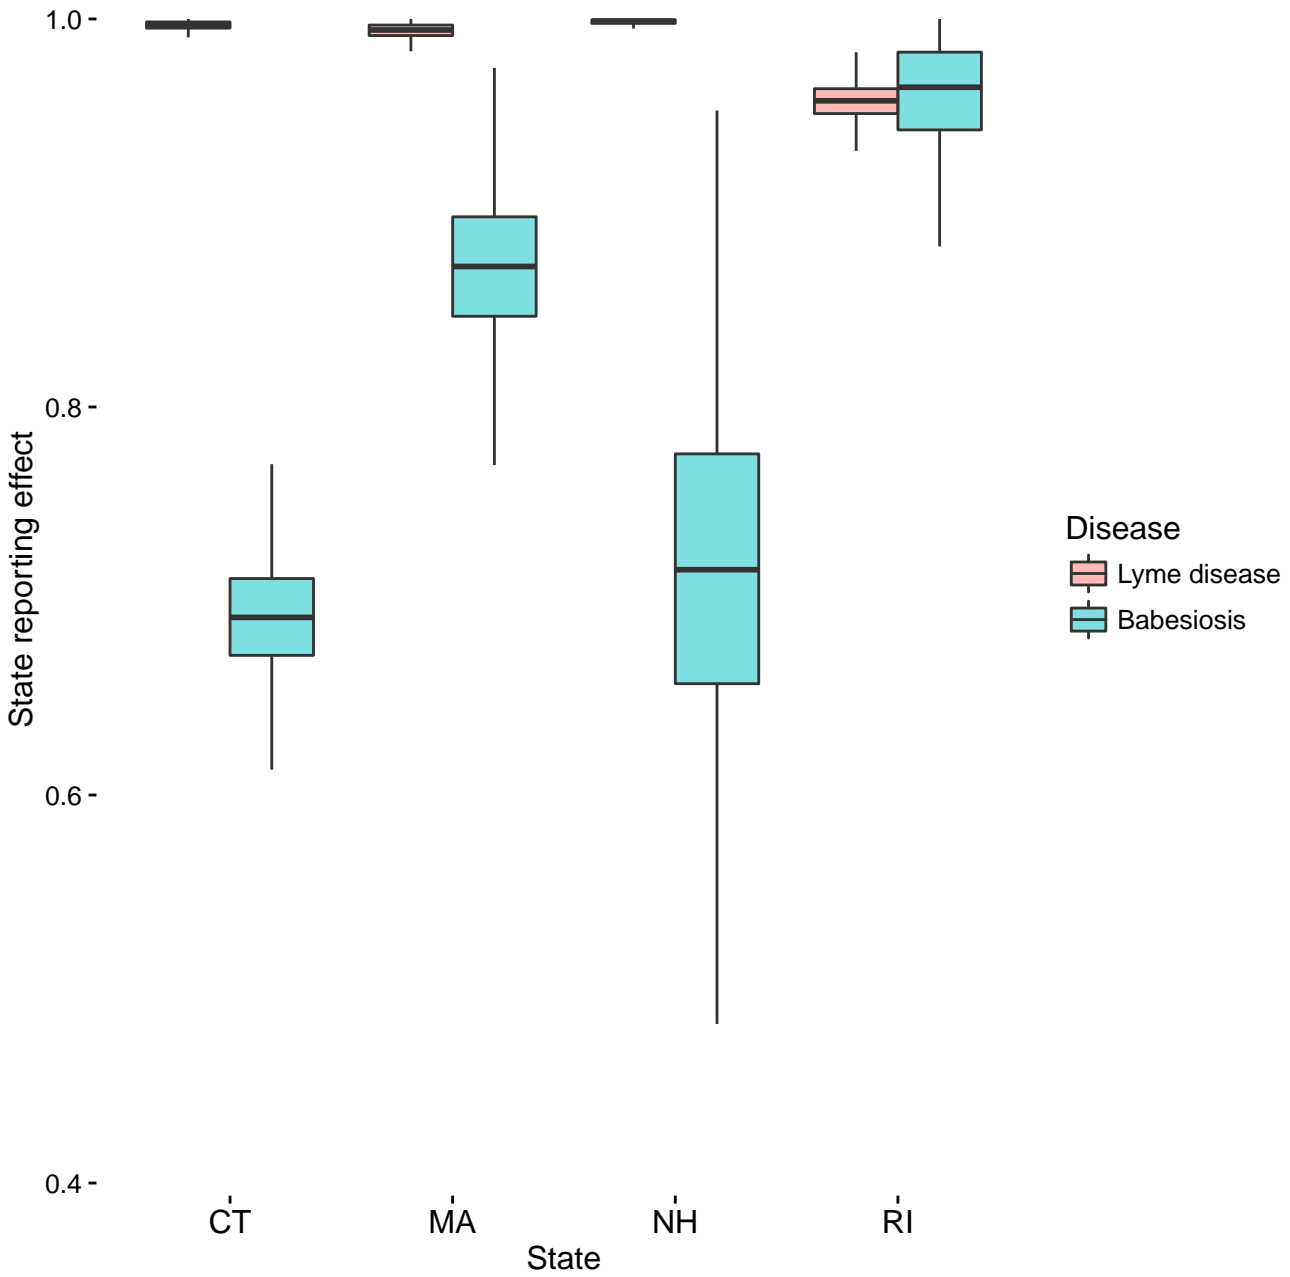

**A**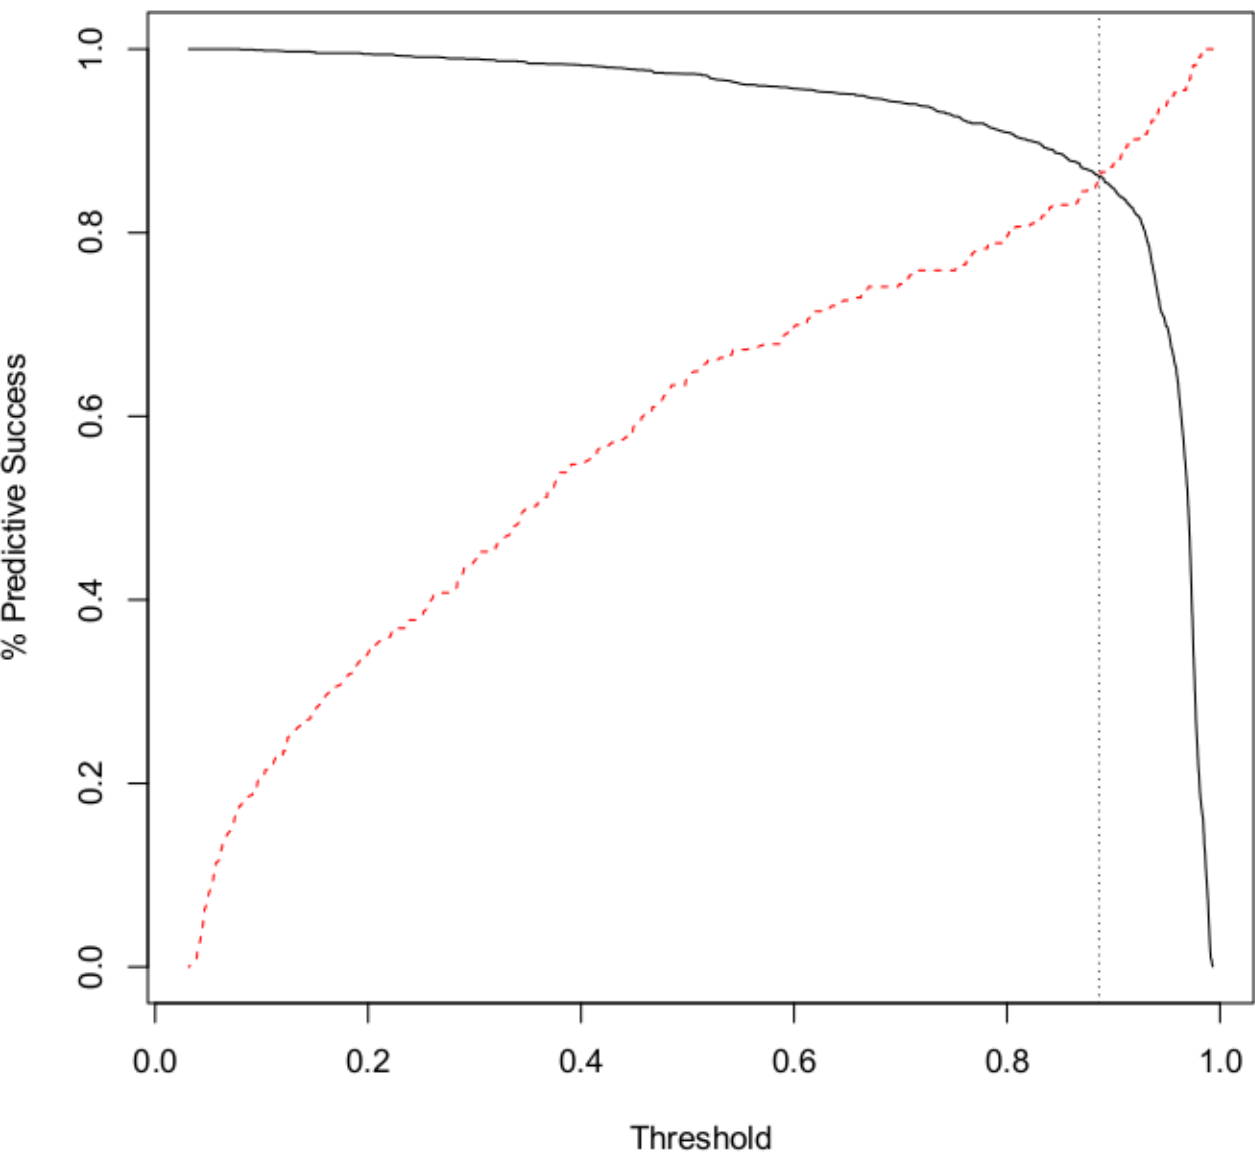**B**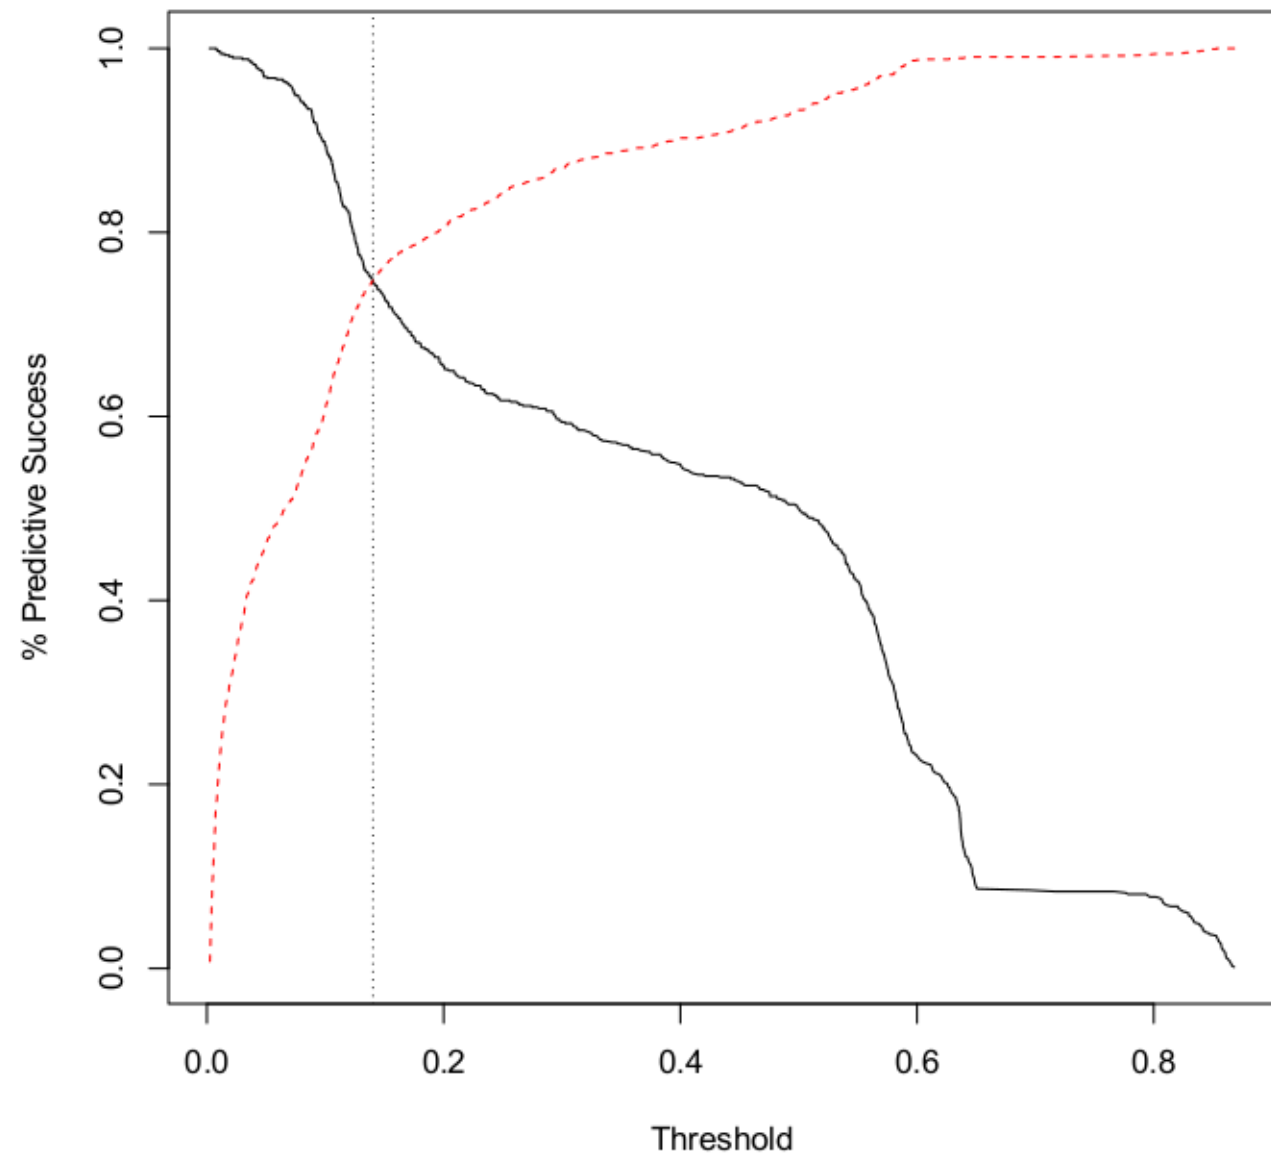

**A**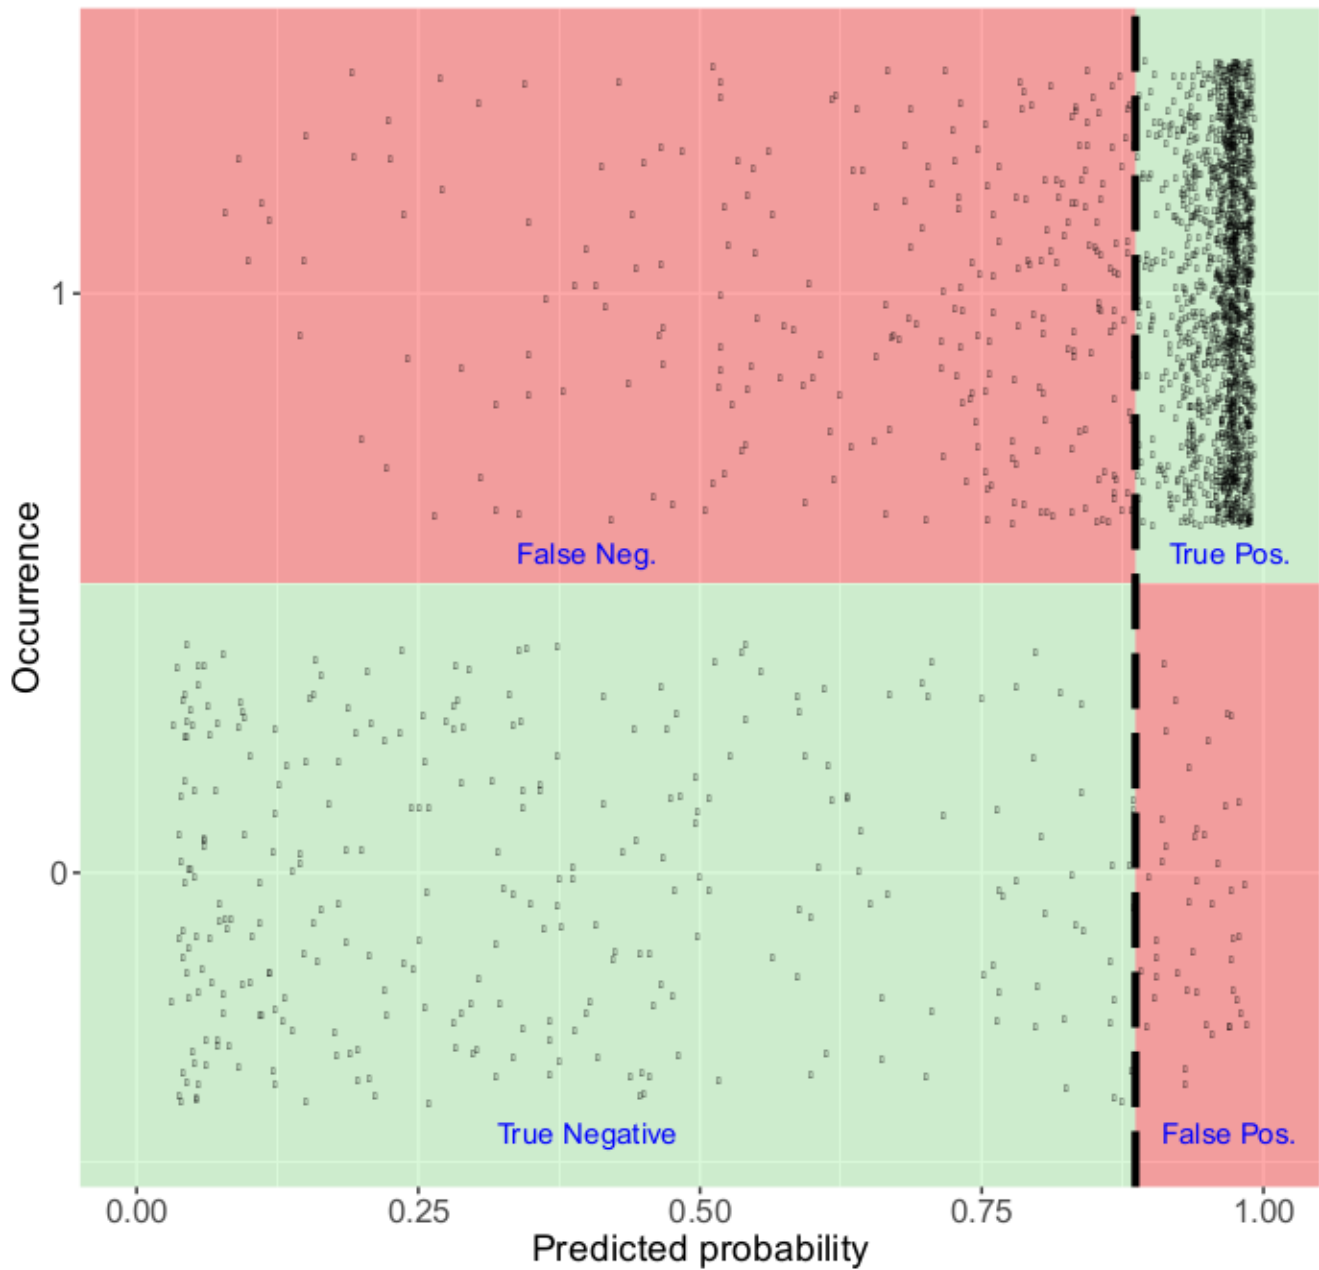**B**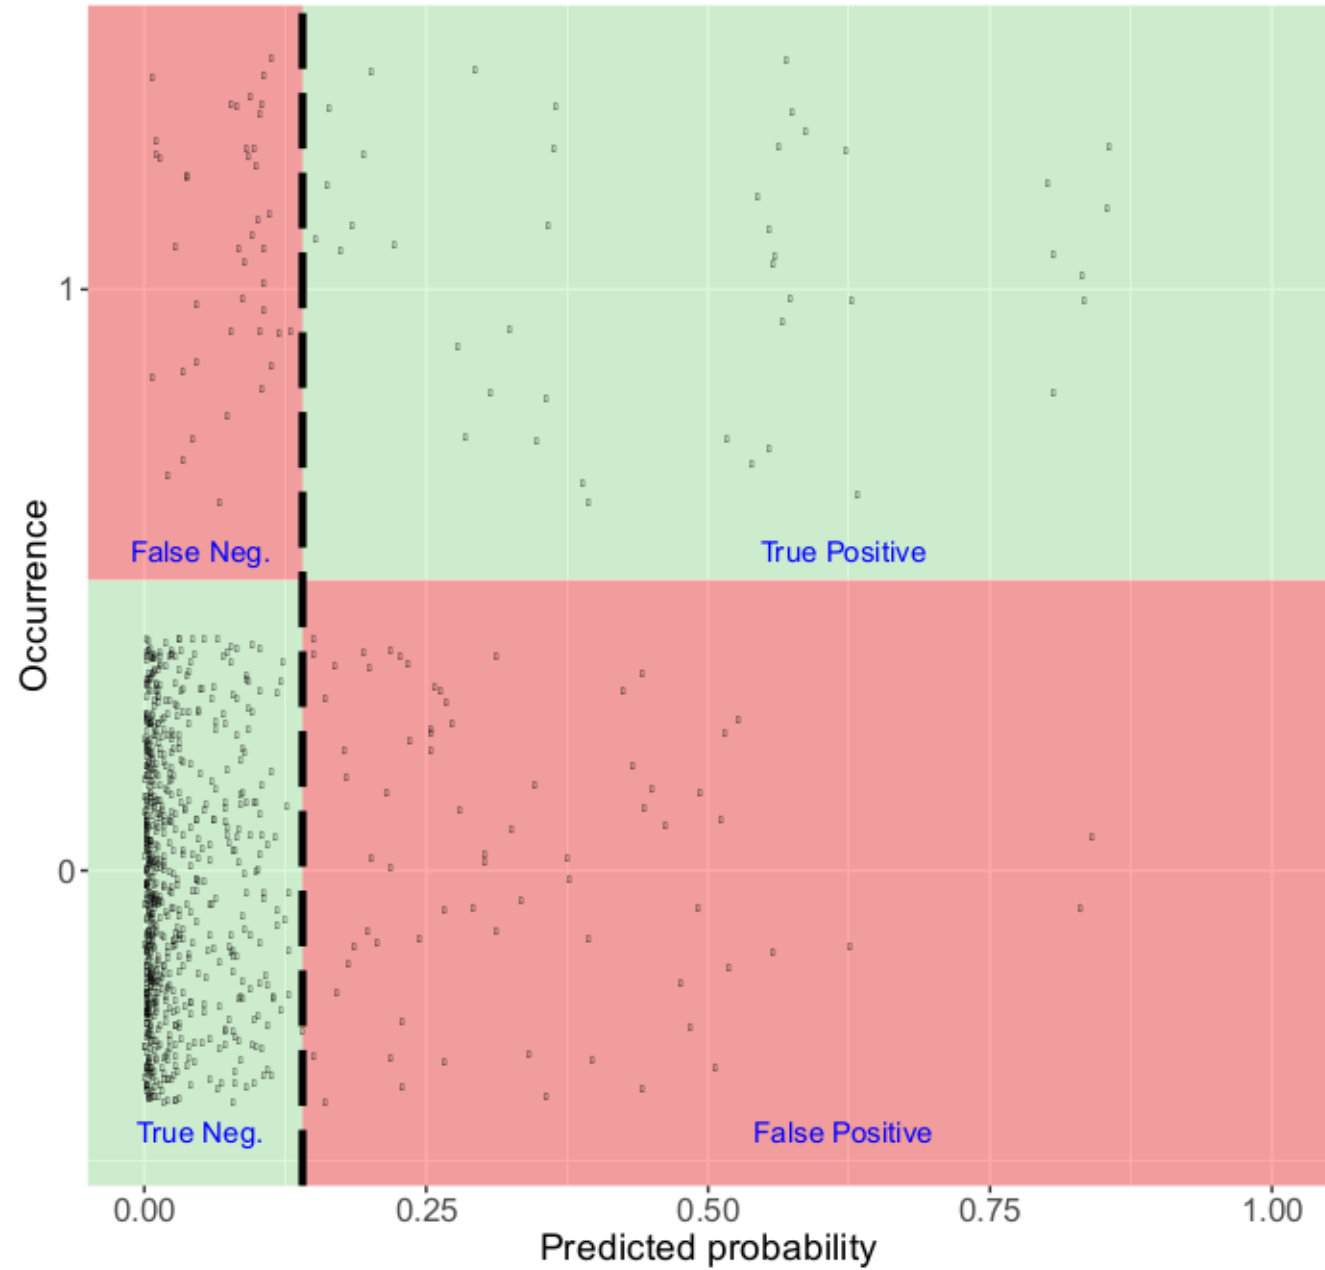

Supplement: rspb20160834supp1.pdf [file rspb20160834supp1.pdf]
